# Supplementary material for: MicroRNA Signature of Human Microvascular Endothelium Infected with Rickettsia rickettsii
Source: PubMed Central journal article supplement (PMC5535962; doi:10.3390/ijms18071471), 2017-07-09
Supplement: ijms-18-01471-s001.pdf [file ijms-18-01471-s001.pdf]

# MicroRNA Signature of Human Microvascular Endothelium Infected with *Rickettsia rickettsii*

Abha Sahni, Hema P. Narra, Jignesh Patel and Sanjeev K. Sahni

**Table S1.** List of primers used in this study.

| Gene          | Orientation | Primer Sequence (5'-3')    |
|---------------|-------------|----------------------------|
| <i>GAPDH</i>  | Forward     | CTGGTAAAGTGGATATTGTTGCCAT  |
|               | Reverse     | TGGAATCATATTGGAACATGTAAACC |
| <i>NOTCH1</i> | Forward     | CGCTGACGGAGTACAAGTG        |
|               | Reverse     | GTAGGAGCCGACCTCGTTG        |
| <i>SMAD2</i>  | Forward     | TCATAGCTTGGATTTACAGCCAG    |
|               | Reverse     | TTCTACCGTGGCATTTCGGTT      |
| <i>SMAD3</i>  | Forward     | GCGTGCGGCTCTACTACATC       |
|               | Reverse     | GCACATTCGGGTCAACTGGTA      |
| <i>RIN2</i>   | Forward     | GCCTGGAACCCGCTGAA          |
|               | Reverse     | CGGAATAGCCACCATCCTTGT      |
| <i>SOD1</i>   | Forward     | TGGGCCAAAGGATGAAGAGA       |
|               | Reverse     | TAGACACATCGGCCACACCAT      |
| <i>SOD2</i>   | Forward     | CAGACCTGCCTTACGACTATGG     |
|               | Reverse     | CTCGGTGGCGTTGAGATTGTT      |
| <i>18S</i>    | Forward     | GTAACCCGTTGAACCCCAT        |
|               | Reverse     | CGCTACTACCGATTGGATGG       |
